# Supplementary material
Source: PubMed Central journal article supplement (PMC4752563)
Supplement: 13280_2015_690_MOESM1_ESM.pdf [file 13280_2015_690_MOESM1_ESM.pdf]

**Ambio**

Electronic Supplementary Material

*This supplementary material has not been peer reviewed.*

**Title: Socio-economic vulnerability to climate change in the central mountainous region of eastern Mexico**

Authors: Manuel Esperón-Rodríguez, Martín Bonifacio-Bautista, Víctor L. Barradas

## Electronic Supplementary Material

**Table S1.** Localities, geographic data, population density, marginalization level, marginalization index, level of human development, and human development index for the 57 municipalities of the Region of the Great Mountains, Veracruz, Mexico (Data from 2010; Veracruz State Government, retrieved 15 July, 2014).

| Municipality            | Localities |       | Surface<br>(km <sup>2</sup> ) | Percentage of<br>state<br>territory (%) | Population<br>density<br>(inhabitants/km <sup>2</sup> ) | Marginalization<br>level | Marginalization<br>index | Level of<br>human<br>development | Human<br>development<br>index |
|-------------------------|------------|-------|-------------------------------|-----------------------------------------|---------------------------------------------------------|--------------------------|--------------------------|----------------------------------|-------------------------------|
|                         | Urban      | Rural |                               |                                         |                                                         |                          |                          |                                  |                               |
| Acultzingo              | 1          | 38    | 167.9                         | 0.2                                     | 124.9                                                   | High                     | 0.5412                   | Medium                           | 0.7218                        |
| Alpatláhuac             | 0          | 38    | 71                            | 0.1                                     | 136.4                                                   | Very High                | 1.1665                   | Medium                           | 0.6532                        |
| Amatlán de los<br>Reyes | 4          | 72    | 151.1                         | 0.2                                     | 279.8                                                   | Medium                   | -0.2780                  | Medium                           | 0.7847                        |
| Aquila                  | 0          | 6     | 20.6                          | < 0.1                                   | 87.1                                                    | Very High                | 1.5558                   | Medium                           | 0.6306                        |
| Astacinga               | 0          | 26    | 38.6                          | 0.1                                     | 155.3                                                   | Very High                | 1.4120                   | Medium                           | 0.6116                        |
| Atlahuilco              | 0          | 36    | 62.1                          | 0.1                                     | 158.1                                                   | Very High                | 1.9712                   | Medium                           | 0.6379                        |
| Atoyac                  | 2          | 73    | 122.7                         | 0.2                                     | 187.4                                                   | Medium                   | -0.5482                  | High                             | 0.8023                        |
| Atzacan                 | 2          | 14    | 65.2                          | 0.1                                     | 307.9                                                   | High                     | 0.3571                   | Medium                           | 0.7079                        |
| Carrillo Puerto         | 0          | 96    | 249.2                         | 0.3                                     | 65.5                                                    | High                     | 0.8307                   | Medium                           | 0.7011                        |
| Camarón de Tejada       | 0          | 30    | 125.8                         | 0.2                                     | 49.5                                                    | High                     | 0.0760                   | Medium                           | 0.7531                        |
| Calchualco              | 0          | 33    | 134.2                         | 0.2                                     | 96.3                                                    | Very High                | 1.5070                   | Medium                           | 0.6189                        |
| Camerino Z.<br>Mendoza  | 2          | 3     | 21.5                          | < 0.1                                   | 1,941.4                                                 | Low                      | -1.0401                  | High                             | 0.8203                        |
| Coetzala                | 0          | 5     | 9.5                           | < 0.1                                   | 226.9                                                   | High                     | 1.0335                   | Medium                           | 0.6789                        |
| Comapa                  | 1          | 66    | 311.8                         | 0.4                                     | 60.0                                                    | High                     | 1.0098                   | Medium                           | 0.6853                        |
| Córdoba                 | 5          | 91    | 159.9                         | 0.2                                     | 1,229.2                                                 | Low                      | -1.1793                  | High                             | 0.8370                        |

|                           |   |     |       |       |         |           |         |        |        |
|---------------------------|---|-----|-------|-------|---------|-----------|---------|--------|--------|
| Coscomatepec              | 3 | 59  | 157.7 | 0.2   | 333.1   | High      | 0.7509  | Medium | 0.6714 |
| Cuichapa                  | 2 | 19  | 34.7  | < 0.1 | 335.6   | Medium    | -0.1428 | Medium | 0.7625 |
| Cuitláhuac                | 1 | 73  | 150.2 | 0.2   | 174.9   | Medium    | -0.5424 | Medium | 0.7943 |
| Chocamán                  | 2 | 17  | 44.4  | 0.1   | 418.6   | High      | 0.2492  | Medium | 0.7062 |
| Fortín                    | 4 | 57  | 61.6  | 0.1   | 970.1   | Low       | -1.0758 | High   | 0.8459 |
| Huatusco                  | 1 | 70  | 202.5 | 0.3   | 269.5   | Medium    | -0.2458 | Medium | 0.7599 |
| Huiloapan de<br>Cauhtémoc | 1 | 4   | 18.7  | < 0.1 | 361.7   | Medium    | -0.5409 | Medium | 0.7945 |
| Ixhuatlán del Café        | 2 | 29  | 129.5 | 0.2   | 165.3   | High      | 0.5655  | Medium | 0.7069 |
| Ixhuatlancillo            | 3 | 16  | 52.6  | 0.1   | 402.4   | High      | 0.1246  | Medium | 0.7362 |
| Ixtaczoquitlán            | 7 | 55  | 137.4 | 0.2   | 476.0   | Low       | -0.6723 | High   | 0.8081 |
| La Perla                  | 1 | 49  | 199.9 | 0.3   | 94.7    | Very High | 1.5064  | Medium | 0.6121 |
| Los Reyes                 | 0 | 20  | 33.8  | < 0.1 | 162.3   | Very High | 1.6858  | Medium | 0.6583 |
| Magdalena                 | 0 | 8   | 13.8  | < 0.1 | 212.1   | High      | 1.0213  | Medium | 0.7052 |
| Maltrata                  | 1 | 31  | 110.9 | 0.2   | 152.4   | High      | -0.0340 | Medium | 0.7345 |
| Mariano Escobedo          | 2 | 48  | 69.6  | 0.1   | 488.0   | Medium    | -0.4146 | Medium | 0.7770 |
| Mixtla de<br>Altamirano   | 0 | 43  | 66.3  | 0.1   | 156.7   | Very High | 2.9278  | Medium | 0.5469 |
| Naranjal                  | 0 | 12  | 18.6  | < 0.1 | 242.3   | High      | 0.5519  | Medium | 0.7388 |
| Nogales                   | 2 | 24  | 63.6  | 0.1   | 545.5   | Low       | -0.9404 | High   | 0.8187 |
| Omealca                   | 1 | 58  | 214.7 | 0.3   | 105.1   | High      | 0.1825  | Medium | 0.7464 |
| Orizaba                   | 1 | 4   | 27.9  | < 0.1 | 4,338.3 | Very Low  | -1.7241 | High   | 0.8872 |
| Paso del Macho            | 1 | 134 | 399.0 | 0.6   | 73.1    | Medium    | -0.1457 | Medium | 0.7524 |
| Rafael Delgado            | 2 | 16  | 26.7  | < 0.1 | 759.1   | High      | 0.1522  | Medium | 0.7358 |

|                      |   |     |       |       |         |           |         |        |        |
|----------------------|---|-----|-------|-------|---------|-----------|---------|--------|--------|
| Río Blanco           | 1 | 3   | 15.2  | < 0.1 | 2,669.8 | Very Low  | -1.5577 | High   | 0.8593 |
| San Andrés Tenejapan | 0 | 9   | 21.9  | < 0.1 | 123.9   | Very High | 1.0879  | Medium | 0.6582 |
| Sochiapa             | 0 | 11  | 16.2  | < 0.1 | 215.8   | High      | 0.4605  | Medium | 0.6814 |
| Soledad Atzompa      | 1 | 34  | 115.7 | 0.2   | 184.9   | Very High | 1.7716  | Medium | 0.5947 |
| Tehuipango           | 0 | 51  | 94.8  | 0.1   | 247.8   | Very High | 2.8054  | Low    | 0.4985 |
| Tenampa              | 0 | 14  | 65.3  | 0.1   | 95.7    | High      | 1.0204  | Medium | 0.6764 |
| Tepatlxaco           | 0 | 12  | 59.8  | 0.1   | 138.0   | Very High | 1.2612  | Medium | 0.6871 |
| Tequila              | 1 | 38  | 99.7  | 0.1   | 146.9   | Very High | 1.6768  | Medium | 0.6596 |
| Texhuacán            | 0 | 18  | 44.0  | 0.1   | 120.2   | Very High | 1.1850  | Medium | 0.6552 |
| Tezonapa             | 2 | 137 | 524.6 | 0.7   | 100.2   | High      | 0.9426  | Medium | 0.7321 |
| Tlacotepec de Mejía  | 0 | 5   | 65.4  | 0.1   | 60.6    | High      | 0.5058  | Medium | 0.7078 |
| Tlaltetela           | 1 | 42  | 278.5 | 0.4   | 52.5    | High      | 0.6979  | Medium | 0.6851 |
| Tlaquilpa            | 0 | 66  | 57.2  | 0.1   | 125.0   | Very High | 43.8    | Medium | 0.6326 |
| Tlilapan             | 1 | 6   | 11.1  | < 0.1 | 441.1   | High      | 0.3656  | Medium | 0.7144 |
| Tomatlán             | 1 | 9   | 18.9  | < 0.1 | 358.8   | Medium    | 23.5    | Medium | 0.7704 |
| Totutla              | 1 | 31  | 97.8  | 0.1   | 167.8   | High      | 0.5247  | Medium | 0.6891 |
| Xoxocotla            | 0 | 17  | 37.2  | 0.1   | 138.9   | Very High | 1.4993  | Medium | 0.6471 |
| Yanga                | 1 | 42  | 89.1  | 0.1   | 196.0   | Medium    | -0.3859 | Medium | 0.7980 |
| Zentla               | 0 | 52  | 178.7 | 0.2   | 69.3    | High      | 0.2760  | Medium | 0.7414 |
| Zongolica            | 1 | 146 | 280.1 | 0.4   | 149.7   | Very High | 1.3342  | Medium | 0.6977 |

**Table S2.** Projections of maximum and minimum changes in temperature ( $T_{MAX}$ ,  $T_{min}$ ; °C) and precipitation ( $Pp_{MAX}$ ,  $Pp_{min}$ ; mm) for the years 2025, 2050, 2075 and 2100 in the Region of the Great Mountains, Veracruz, Mexico. For all scenarios,  $T_{MAX}$  was found in La Joya;  $T_{min}$  was found in Los Pescados;  $Pp_{MAX}$  was found in Totutla, and  $Pp_{min}$  was found in Ixhuacán.

| <b>Year</b> | <b><math>T_{MAX}</math></b> | <b><math>T_{min}</math></b> | <b><math>Pp_{MAX}</math></b> | <b><math>Pp_{min}</math></b> |
|-------------|-----------------------------|-----------------------------|------------------------------|------------------------------|
| 2025        | 1.25                        | -0.83                       | 107.45                       | -98.38                       |
| 2050        | 3.84                        | -2.55                       | 331.32                       | -303.35                      |
| 2075        | 6.44                        | -4.28                       | 555.18                       | -508.32                      |
| 2100        | 9.04                        | -6.00                       | 779.04                       | -713.29                      |
